# Supplementary material for: Development of Selection Indices for Improvement of Seed Yield and Lipid Composition in Bambara Groundnut (Vigna subterranea (L.) Verdc.)
Source: MDPI journal article supplement (doi:10.3390/foods11010086), 2021-12-29
Supplement: s1 [file s1]

**Table S1:** Proximate composition of 100 bambara groundnut lines, seven soybean lines and three cowpea lines expressed in g/100g dry weight, except for moisture which is expressed in g/100g of seed fresh weight. Mean values  $\pm$  standard deviation of technical triplicate analysis. Significance of differences between means of accessions indicated by (\*\*) are  $p < 0.01$ . Mean values and standard deviation calculated from experimental raw data values. DBB=Dotted brown/black eye, LBLBE=Light brown/light brown eye

| Line ID                  | Line               | Moisture        | Ash             | Crude protein    | Lipid           | Total carbohydrate | Metabolised Energy (kJ) |
|--------------------------|--------------------|-----------------|-----------------|------------------|-----------------|--------------------|-------------------------|
| <b>Bambara groundnut</b> |                    |                 |                 |                  |                 |                    |                         |
| RA1700101                | 100SB16ANAM-C      | 6.36 $\pm$ 0.32 | 6.07 $\pm$ 0.06 | 22.43 $\pm$ 0.13 | 7.35 $\pm$ 0.07 | 64.16 $\pm$ 0.20   | 1673.12 $\pm$ 0.56      |
| RA1700102                | 104S-1913NAM       | 6.44 $\pm$ 0.11 | 4.50 $\pm$ 0.16 | 19.73 $\pm$ 0.10 | 8.33 $\pm$ 0.17 | 67.44 $\pm$ 0.33   | 1724.04 $\pm$ 2.96      |
| RA1700103                | 109BWA1BWA-1       | 6.16 $\pm$ 0.58 | 5.52 $\pm$ 0.17 | 15.99 $\pm$ 0.16 | 6.91 $\pm$ 0.09 | 71.59 $\pm$ 0.42   | 1690.52 $\pm$ 1.68      |
| RA1700104                | 20Acc118CIV-B      | 6.83 $\pm$ 0.52 | 5.94 $\pm$ 0.10 | 22.67 $\pm$ 0.21 | 7.82 $\pm$ 0.12 | 63.57 $\pm$ 0.31   | 1683.01 $\pm$ 1.08      |
| RA1700105                | 56Acc89MLI-C       | 5.87 $\pm$ 0.12 | 6.18 $\pm$ 0.20 | 17.22 $\pm$ 0.05 | 8.08 $\pm$ 0.06 | 68.51 $\pm$ 0.22   | 1697.35 $\pm$ 3.34      |
| RA1700106                | 84ACC696ZMB-2      | 6.48 $\pm$ 0.09 | 6.61 $\pm$ 0.05 | 14.81 $\pm$ 0.12 | 7.99 $\pm$ 0.16 | 70.58 $\pm$ 0.19   | 1694.42 $\pm$ 2.50      |
| RA1700107                | 99SB4-2NAM-A       | 6.23 $\pm$ 0.01 | 6.33 $\pm$ 0.07 | 20.15 $\pm$ 0.10 | 7.86 $\pm$ 0.05 | 65.66 $\pm$ 0.10   | 1683.41 $\pm$ 1.58      |
| RA1700108                | 60ACC32NGA-A       | 6.05 $\pm$ 0.62 | 4.56 $\pm$ 0.28 | 14.75 $\pm$ 0.13 | 6.55 $\pm$ 0.11 | 74.14 $\pm$ 0.45   | 1703.56 $\pm$ 3.30      |
| RA1700109                | 1-76ACC390SDN-CA11 | 7.63 $\pm$ 0.86 | 7.72 $\pm$ 0.20 | 24.85 $\pm$ 0.25 | 6.33 $\pm$ 0.03 | 61.46 $\pm$ 0.47   | 1620.66 $\pm$ 3.38      |
| RA1700110                | 91UNISRSA-B        | 5.94 $\pm$ 0.22 | 4.01 $\pm$ 0.10 | 18.67 $\pm$ 0.19 | 6.95 $\pm$ 0.05 | 70.37 $\pm$ 0.10   | 1710.14 $\pm$ 1.81      |
| RA1700111                | 92AHM968NAM-C      | 7.49 $\pm$ 0.05 | 4.21 $\pm$ 0.10 | 17.59 $\pm$ 0.21 | 7.07 $\pm$ 0.16 | 71.13 $\pm$ 0.38   | 1711.80 $\pm$ 3.10      |
| RA1700112                | Ankpa4             | 7.21 $\pm$ 0.50 | 5.72 $\pm$ 0.16 | 24.45 $\pm$ 0.38 | 5.41 $\pm$ 0.07 | 64.42 $\pm$ 0.60   | 1639.09 $\pm$ 2.54      |
| RA1700113                | BC12105            | 6.41 $\pm$ 0.17 | 5.22 $\pm$ 0.15 | 22.80 $\pm$ 0.12 | 7.80 $\pm$ 0.01 | 64.19 $\pm$ 0.24   | 1694.64 $\pm$ 3.03      |
| RA1700114                | BC31107            | 5.86 $\pm$ 0.35 | 5.93 $\pm$ 0.13 | 21.31 $\pm$ 0.08 | 6.58 $\pm$ 0.03 | 66.18 $\pm$ 0.22   | 1664.40 $\pm$ 1.98      |
| RA1700115                | BCGC12107          | 5.99 $\pm$ 0.45 | 4.49 $\pm$ 0.04 | 21.52 $\pm$ 0.09 | 8.06 $\pm$ 0.14 | 65.93 $\pm$ 0.24   | 1714.90 $\pm$ 1.79      |
| RA1700116                | BCGC23107          | 5.74 $\pm$ 0.13 | 4.64 $\pm$ 0.09 | 19.49 $\pm$ 0.16 | 8.14 $\pm$ 0.05 | 67.72 $\pm$ 0.19   | 1718.96 $\pm$ 2.75      |
| RA1700117                | BCL33107           | 6.39 $\pm$ 0.19 | 5.85 $\pm$ 0.17 | 21.97 $\pm$ 0.04 | 6.72 $\pm$ 0.02 | 65.46 $\pm$ 0.16   | 1666.62 $\pm$ 3.04      |
| RA1700118                | BH16107            | 7.95 $\pm$ 0.53 | 5.33 $\pm$ 0.11 | 23.94 $\pm$ 0.04 | 6.79 $\pm$ 0.09 | 63.93 $\pm$ 0.18   | 1671.84 $\pm$ 2.08      |
| RA1700119                | BH17107            | 6.36 $\pm$ 0.20 | 5.61 $\pm$ 0.28 | 21.34 $\pm$ 0.06 | 7.03 $\pm$ 0.07 | 66.02 $\pm$ 0.38   | 1677.90 $\pm$ 3.81      |
| RA1700120                | BD                 | 6.18 $\pm$ 0.23 | 4.83 $\pm$ 0.34 | 18.99 $\pm$ 0.07 | 8.76 $\pm$ 0.06 | 67.42 $\pm$ 0.29   | 1728.20 $\pm$ 5.47      |
| RA1700121                | Bogor              | 4.64 $\pm$ 0.04 | 3.97 $\pm$ 0.08 | 24.71 $\pm$ 0.17 | 5.89 $\pm$ 0.50 | 65.43 $\pm$ 0.58   | 1676.75 $\pm$ 8.33      |
| RA1700122                | Burkina            | 6.30 $\pm$ 0.04 | 4.17 $\pm$ 0.05 | 20.17 $\pm$ 0.11 | 6.27 $\pm$ 0.12 | 69.39 $\pm$ 0.25   | 1691.68 $\pm$ 1.31      |

| Line ID   | Line name               | Moisture   | Ash       | Crude protein | Lipid     | Total carbohydrate | Metabolised Energy (kJ) |
|-----------|-------------------------|------------|-----------|---------------|-----------|--------------------|-------------------------|
| RA1700123 | Cikur2.1                | 7.13± 0.34 | 5.97±0.21 | 23.51±0.23    | 7.41±0.09 | 63.10±0.10         | 1673.18±4.75            |
| RA1700124 | Cikur2.3                | 5.64± 0.51 | 5.92±0.12 | 17.44±0.08    | 7.78±0.09 | 68.86±0.05         | 1695.72±3.39            |
| RA1700125 | Cikur3.3                | 6.85± 0.33 | 5.20±0.49 | 20.53±0.25    | 7.85±0.09 | 66.41±0.52         | 1701.56±7.07            |
| RA1700126 | Cream Grey Eye-49       | 6.32± 0.36 | 5.64±0.26 | 16.50±0.11    | 6.52±0.08 | 71.35±0.28         | 1680.18±5.70            |
| RA1700127 | Cream Light Brown Eye   | 5.65± 0.75 | 6.14±0.05 | 18.88±0.21    | 6.22±0.05 | 68.76±0.22         | 1660.43±2.16            |
| RA1700128 | Cream with black splash | 6.26± 0.60 | 6.45±0.18 | 17.42±0.13    | 5.37±0.01 | 70.75±0.28         | 1643.32±3.45            |
| RA1700129 | DipC_CFF                | 8.14± 0.10 | 4.36±0.10 | 20.41±0.02    | 5.87±0.11 | 69.36±0.06         | 1680.59±3.51            |
| RA1700130 | DipC_UoN                | 8.19± 0.24 | 5.02±0.23 | 25.23±0.11    | 6.96±0.07 | 62.79±0.19         | 1676.87±2.40            |
| RA1700131 | DodR_CFF                | 7.08± 0.22 | 6.11±0.05 | 18.14±0.12    | 6.80±0.13 | 68.95±0.21         | 1673.26±2.92            |
| RA1700132 | DodR_UoN                | 7.80± 0.14 | 5.66±0.18 | 21.11±0.16    | 7.26±0.05 | 65.97±0.25         | 1681.73±3.06            |
| RA1700133 | DBB                     | 6.38± 0.37 | 5.76±0.16 | 17.05±0.06    | 6.35±0.07 | 70.85±0.12         | 1673.73±3.88            |
| RA1700134 | Exsokoto                | 7.21± 0.56 | 5.95±0.07 | 21.96±0.16    | 6.84±0.14 | 65.25±0.28         | 1667.12±2.95            |
| RA1700135 | Exsokoto-39             | 6.57± 0.09 | 5.46±0.19 | 21.63±0.25    | 7.30±0.02 | 65.62±0.08         | 1684.51±2.95            |
| RA1700136 | Exsokoto-177            | 6.31± 0.37 | 5.69±0.03 | 21.79±0.14    | 6.06±0.28 | 66.46±0.42         | 1657.79±4.40            |
| RA1700137 | Exsokoto-183            | 5.07± 0.06 | 5.42±0.60 | 23.81±0.25    | 6.35±0.04 | 64.42±0.45         | 1662.65±10.34           |
| RA1700138 | GC11105                 | 4.71± 0.35 | 4.39±0.13 | 23.18±0.11    | 8.36±0.06 | 64.07±0.24         | 1717.92±2.55            |
| RA1700139 | GC32105                 | 4.67± 0.58 | 4.58±0.21 | 19.36±0.06    | 8.05±0.07 | 68.01±0.30         | 1718.62±3.43            |
| RA1700140 | GC35107                 | 6.39± 0.08 | 4.03±0.08 | 24.33±0.12    | 7.79±0.18 | 63.85±0.25         | 1710.84±4.10            |
| RA1700141 | GCL13105                | 6.93± 0.12 | 3.82±0.23 | 22.72±0.05    | 8.24±0.10 | 65.22±0.37         | 1726.61±2.54            |
| RA1700142 | Getso                   | 6.61±0.05  | 5.74±0.20 | 27.15±0.55    | 5.73±0.15 | 61.38±0.52         | 1637.62±4.98            |
| RA1700143 | GH17105                 | 7.01± 0.23 | 3.80±0.15 | 21.71±0.13    | 8.60±0.29 | 65.90±0.55         | 1735.90±2.80            |
| RA1700144 | GH21105                 | 7.38± 0.23 | 4.30±0.30 | 22.47±0.06    | 7.04±0.11 | 66.18±0.37         | 1697.39±5.53            |
| RA1700145 | GH36107                 | 6.89± 0.01 | 5.25±0.29 | 21.61±0.14    | 7.57±0.21 | 65.57±0.45         | 1693.06±5.32            |
| RA1700146 | GH37107                 | 5.74± 0.21 | 3.92±0.15 | 21.59±0.01    | 8.71±0.06 | 65.78±0.09         | 1736.28±3.58            |
| RA1700147 | GHC36105                | 7.11± 0.08 | 4.92±0.13 | 20.63±0.12    | 6.56±0.17 | 67.89±0.30         | 1682.76±3.87            |
| RA1700148 | Gresik_CFF_2016         | 6.74± 0.14 | 4.33±0.05 | 22.05±0.13    | 5.21±0.22 | 68.41±0.32         | 1665.02±3.62            |
| RA1700149 | Gresik_UoN              | 8.52± 0.32 | 6.21±0.20 | 26.33±0.13    | 6.13±0.02 | 61.33±0.32         | 1639.03±3.79            |
| RA1700150 | GOBRAS2.2               | 6.43± 0.14 | 3.75±0.09 | 17.81±0.11    | 7.72±0.10 | 70.71±0.28         | 1730.62±1.33            |
| RA1700151 | IITA 686_CFF            | 6.40± 0.15 | 5.36±0.07 | 16.76±0.09    | 6.50±0.04 | 71.38±0.06         | 1684.07±1.02            |
| RA1700152 | IITA-686_UoN            | 8.22± 0.09 | 5.76±0.22 | 19.63±0.15    | 6.92±0.12 | 67.69±0.43         | 1677.56±3.52            |

| Line ID   | Line name       | Moisture   | Ash       | Crude protein | Lipid     | Total carbohydrate | Metabolised Energy (kJ) |
|-----------|-----------------|------------|-----------|---------------|-----------|--------------------|-------------------------|
| RA1700153 | IPB Bam-1       | 5.94± 0.15 | 4.06±0.14 | 23.08±0.03    | 7.71±0.05 | 65.15±0.09         | 1712.06±2.82            |
| RA1700154 | IPB Bam-2       | 5.83± 0.12 | 4.55±0.20 | 20.80±0.19    | 7.46±0.09 | 67.20±0.24         | 1704.97±1.66            |
| RA1700155 | IPB Bam-5       | 6.01± 0.02 | 4.42±0.19 | 21.48±0.13    | 7.93±0.07 | 66.16±0.21         | 1713.95±2.37            |
| RA1700156 | IPB Bam-6       | 6.18± 0.04 | 5.00±0.15 | 25.18±0.12    | 6.35±0.04 | 63.47±0.17         | 1666.21±2.79            |
| RA1700157 | IPB Bam-10      | 5.67± 0.20 | 4.49±0.03 | 23.90±0.11    | 7.74±0.08 | 63.88±0.13         | 1703.10±2.05            |
| RA1700158 | Kaaro           | 5.02± 0.15 | 4.72±0.05 | 21.56±0.04    | 5.44±0.03 | 68.27±0.03         | 1663.76±1.06            |
| RA1700159 | Kaaro-4         | 5.91± 0.05 | 5.32±0.08 | 22.85±0.08    | 5.46±0.05 | 66.36±0.13         | 1650.73±0.61            |
| RA1700160 | Kaaro-66        | 5.49± 0.27 | 5.05±0.03 | 20.61±0.04    | 6.06±0.02 | 68.28±0.04         | 1671.55±0.99            |
| RA1700161 | Kaaro-74        | 5.16± 0.06 | 5.24±0.10 | 19.68±0.17    | 5.98±0.05 | 69.10±0.22         | 1669.37±2.87            |
| RA1700162 | Kano2           | 8.11± 0.32 | 5.77±0.22 | 22.56±0.37    | 6.60±0.11 | 65.07±0.39         | 1664.22±5.66            |
| RA1700163 | Kano3           | 8.41± 0.52 | 5.56±0.30 | 24.98±0.51    | 6.49±0.01 | 62.97±0.31         | 1659.87±4.20            |
| RA1700164 | LunT            | 8.05± 0.25 | 4.14±0.20 | 17.90±0.15    | 5.81±0.17 | 72.15±0.23         | 1689.45±4.34            |
| RA1700165 | LBLBE           | 5.52± 0.26 | 4.56±0.02 | 17.11±0.12    | 5.94±0.03 | 72.39±0.08         | 1686.60±0.71            |
| RA1700166 | Mottled Black   | 6.74± 0.51 | 4.30±0.09 | 18.65±0.04    | 4.24±0.12 | 72.81±0.14         | 1656.55±2.92            |
| RA1700167 | Nav4-13         | 6.52± 0.33 | 5.02±0.25 | 16.97±0.11    | 6.26±0.03 | 71.76±0.25         | 1684.89±4.61            |
| RA1700168 | Rajap 3.2       | 7.17± 0.37 | 4.17±0.13 | 22.42±0.06    | 6.92±0.11 | 66.49±0.02         | 1697.62±3.85            |
| RA1700169 | S19-3_CFF       | 5.47± 0.30 | 5.15±0.01 | 20.63±0.12    | 6.61±0.08 | 67.61±0.20         | 1679.83±0.99            |
| RA1700170 | S19-3_UoN       | 8.46± 0.35 | 5.84±0.24 | 28.88±0.01    | 6.39±0.03 | 58.89±0.26         | 1643.48±3.87            |
| RA1700171 | Situraja2       | 7.39± 0.18 | 4.66±0.31 | 22.16±0.09    | 6.90±0.08 | 66.28±0.31         | 1689.55±3.64            |
| RA1700172 | Songkhla-1      | 5.18± 0.04 | 5.09±0.09 | 18.90±0.03    | 7.37±0.06 | 68.65±0.04         | 1698.84±2.49            |
| RA1700173 | Songkhla-1-38   | 5.67± 0.04 | 5.59±0.12 | 17.87±0.07    | 7.14±0.02 | 69.41±0.16         | 1688.81±1.85            |
| RA1700174 | Songkhla-1-72   | 5.88± 0.09 | 5.49±0.05 | 18.22±0.09    | 6.99±0.18 | 69.31±0.29         | 1686.98±2.72            |
| RA1700175 | Songkhla-1-90   | 5.68± 0.17 | 5.21±0.07 | 17.43±0.05    | 6.21±0.47 | 71.15±0.42         | 1679.64±8.67            |
| RA1700176 | Sukuraja-2      | 3.36± 0.13 | 3.67±0.04 | 14.57±0.12    | 6.85±0.20 | 74.91±0.10         | 1724.33±4.18            |
| RA1700177 | Thung yang dang | 3.77± 0.20 | 4.16±0.14 | 18.23±0.11    | 7.21±0.22 | 70.41±0.45         | 1713.45±2.42            |
| RA1700178 | Tiga Nicaru     | 7.69± 0.10 | 5.45±0.03 | 22.10±0.22    | 6.54±0.09 | 65.92±0.22         | 1669.93±2.43            |
| RA1700179 | TVSU738         | 6.44± 0.20 | 5.02±0.21 | 20.13±0.07    | 5.77±0.08 | 69.08±0.23         | 1668.31±1.89            |
| RA1700180 | TVSU89          | 4.02± 0.03 | 4.71±0.03 | 21.92±0.04    | 6.32±0.14 | 67.04±0.12         | 1678.93±2.34            |
| RA1700181 | TVSu880         | 4.52± 0.27 | 4.82±0.03 | 18.98±0.12    | 6.88±0.09 | 69.32±0.19         | 1694.49±1.32            |

| Line ID                          | Line name            | Moisture   | Ash       | Crude protein | Lipid      | Total carbohydrate | Metabolised Energy (kJ) |
|----------------------------------|----------------------|------------|-----------|---------------|------------|--------------------|-------------------------|
| RA1700182                        | TVSu879              | 5.02± 0.25 | 4.78±0.11 | 20.97±0.17    | 6.73±0.07  | 67.52±0.92         | 1687.41±2.45            |
| RA1700183                        | TVSu702              | 4.54± 0.14 | 4.36±0.03 | 18.29±0.04    | 8.30±0.21  | 69.05±0.15         | 1729.47±3.55            |
| RA1700184                        | TVSU 334             | 4.46± 0.19 | 4.71±0.11 | 21.57±0.16    | 6.58±0.10  | 67.14±0.94         | 1684.39±2.21            |
| RA1700185                        | TVSU 922             | 7.29± 0.17 | 4.88±0.15 | 20.47±0.19    | 7.43±0.02  | 67.22±0.30         | 1699.67±2.68            |
| RA1700186                        | TVSU 924             | 4.94± 0.07 | 5.13±0.03 | 20.91±0.40    | 7.50±0.07  | 66.46±0.27         | 1695.48±0.50            |
| RA1700187                        | TVSu 323             | 6.37± 0.18 | 5.59±0.11 | 25.03±0.25    | 6.01±0.04  | 63.37±0.97         | 1650.57±1.72            |
| RA1700188                        | TVSU1023             | 6.24± 0.20 | 5.23±0.22 | 21.02±0.35    | 7.47±0.07  | 66.28±0.73         | 1692.88±3.34            |
| RA1700189                        | TVSU1033             | 4.77± 0.22 | 5.13±0.12 | 22.99±0.18    | 6.27±0.05  | 65.61±0.12         | 1668.25±1.28            |
| RA1700190                        | TVSU 1231            | 5.15± 0.37 | 4.37±0.08 | 21.15±0.08    | 4.97±0.05  | 69.50±0.08         | 1662.25±1.05            |
| RA1700191                        | TVSU702-2018         | 5.14± 0.29 | 5.93±0.25 | 19.94±0.06    | 6.51±0.15  | 67.62±0.30         | 1666.40±4.25            |
| RA1700192                        | TVSU879-2018         | 5.69± 0.01 | 5.82±0.02 | 18.58±0.15    | 5.95±0.09  | 69.65±0.09         | 1661.74±2.27            |
| RA1700193                        | TVSU880-2018         | 5.14± 0.05 | 5.80±0.05 | 20.71±0.17    | 6.16±0.53  | 67.33±0.72         | 1660.61±8.56            |
| RA1700194                        | Uniswa Red           | 5.25± 0.44 | 4.30±0.24 | 18.65±0.23    | 6.84±0.03  | 70.22±0.46         | 1703.33±4.66            |
| RA1700195                        | Uniswa Red _AB_CFF   | 7.40± 0.78 | 4.49±0.15 | 16.92±0.19    | 6.28±0.07  | 72.31±0.15         | 1694.45±2.99            |
| RA1700196                        | Uniswa Red_Red_UoN   | 8.57± 0.10 | 5.21±0.05 | 22.26±0.08    | 7.53±0.11  | 65.00±0.16         | 1691.36±1.75            |
| RA1700197                        | Uniswa Red_Green_UoN | 8.17± 0.11 | 6.25±0.17 | 26.54±0.24    | 5.90±0.07  | 61.30±0.45         | 1633.71±2.99            |
| RA1700198                        | URUG2(1)             | 4.30± 0.13 | 3.77±0.13 | 23.27±0.06    | 7.74±0.21  | 65.22±0.32         | 1716.91±4.07            |
| RA1700199                        | Zebra Cream-8        | 4.16± 0.09 | 4.16±0.17 | 17.02±0.08    | 5.64±0.17  | 73.17±0.29         | 1688.23±4.56            |
| RA1700200                        | Zebra Cream-10       | 3.62±0.18  | 3.93±0.11 | 22.76±0.11    | 5.85±0.02  | 67.46±0.20         | 1681.61±1.60            |
| Overall Min                      |                      | 3.36       | 3.68      | 14.57         | 4.24       | 58.65              | 1618.11                 |
| Overall Max                      |                      | 8.57       | 7.35      | 28.88         | 8.76       | 75.00              | 1738.59                 |
| Overall Mean                     |                      | 6.22       | 5.07      | 20.81         | 6.84       | 67.28              | 1684.83                 |
| Overall standard deviation       |                      | 1.20       | 0.77      | 2.84          | 0.90       | 3.08               | 24.40                   |
| Significance of line differences |                      | **         | **        | **            | **         | **                 | **                      |
| <b>Soybean</b>                   |                      |            |           |               |            |                    |                         |
| RA1700201                        | Williams82           | 4.83±0.05  | 7.80±0.13 | 43.48±0.36    | 15.88±0.12 | 32.84±0.58         | 1744.40±1.67            |
| RA1700202                        | Stuart               | 3.80±0.13  | 6.42±0.15 | 46.02±0.14    | 17.39±0.19 | 30.17±0.36         | 1788.71±0.99            |
| RA1700203                        | Essex                | 4.19±0.02  | 7.54±0.14 | 42.03±0.19    | 19.74±0.13 | 30.7±0.36          | 1822.04±3.48            |
| RA1700204                        | Peking               | 4.00±0.09  | 7.74±0.53 | 49.91±0.41    | 15.52±0.24 | 26.83±0.68         | 1722.93±8.59            |
| RA1700205                        | Asgrow               | 4.35±0.22  | 6.20±0.15 | 44.63±0.25    | 20.33±0.23 | 28.85±0.53         | 1848.98±4.01            |

|                                  |              |           |           |            |            |            |              |
|----------------------------------|--------------|-----------|-----------|------------|------------|------------|--------------|
| RA1700206                        | Richmond     | 4.99±0.01 | 5.92±0.07 | 43.37±0.31 | 19.53±0.12 | 31.18±0.35 | 1842.55±1.24 |
| RA1700207                        | Hayman       | 4.38±0.03 | 6.98±0.02 | 40.90±0.17 | 21.23±0.32 | 30.89±0.49 | 1861.23±5.35 |
| Overall Min                      | 3.65         | 5.85      |           | 40.71      | 15.26      | 26.07      | 1716.64      |
| Overall Max                      | 5.00         | 8.16      |           | 50.25      | 21.45      | 33.47      | 1865.14      |
| Overall Mean                     | 4.36         | 6.94      |           | 44.33      | 18.51      | 30.21      | 1804.41      |
| Overall standard deviation       | 0.42         | 0.76      |           | 2.82       | 2.14       | 1.86       | 51.32        |
| Significance of line differences |              | **        | **        | **         | **         | **         | **           |
| <b>Cowpea</b>                    |              |           |           |            |            |            |              |
| RA1700215                        | IT84S-2246-4 | 6.46±0.42 | 5.19±0.04 | 25.52±0.16 | 1.54±0.17  | 62.83±0.19 | 1575.79±2.66 |
| RA1700216                        | Han Chui Yen | 4.91±0.44 | 5.83±0.09 | 28.39±0.11 | 1.66±0.06  | 62.36±0.06 | 1559.81±2.50 |
| RA1700217                        | 524B         | 5.08±0.08 | 5.42±0.02 | 24.08±0.10 | 1.54±0.21  | 65.18±0.28 | 1575.37±3.85 |
| Overall Min                      |              | 4.91      | 5.15      | 24.02      | 1.31       | 62.29      | 1557.04      |
| Overall Max                      |              | 6.46      | 5.94      | 28.51      | 1.73       | 65.46      | 1578.86      |
| Overall standard deviation       |              | 0.85      | 0.29      | 1.91       | 0.15       | 1.32       | 8.32         |
| Significance of line differences |              | **        | **        | **         | *          | **         | **           |

**Table S2:** Fatty acid composition of 100 bambara groundnut (*V. subterranea*) lines, seven soybean lines and three cowpea lines expressed as % of total fatty acid. Mean values ± standard deviation of technical triplicate analysis. Significance of differences between means of lines indicated by (\*\*) are  $p < 0.01$ . Mean values and standard deviation calculated from raw data values. DBB=Dotted brown/black eye, LBLBE=Light brown/light brown eye.

| Line ID   | Line               | Linoleic Acid | Oleic Acid | Palmitic acid | Stearic acid | Behenic Acid | Arachidic Acid | Lignoceric acid | $\alpha$ -Linolenic Acid |
|-----------|--------------------|---------------|------------|---------------|--------------|--------------|----------------|-----------------|--------------------------|
| RA1700101 | 100SB16ANAM-C      | 35.06±0.12    | 25.32±0.62 | 16.57±0.07    | 6.57±0.045   | 5.98±0.054   | 2.10±0.01      | 2.96±0.04       | 2.40±0.02                |
| RA1700102 | 104S-1913NAM       | 34.60±0.05    | 23.19±0.03 | 17.22±0.02    | 8.08±0.02    | 6.39±0.039   | 2.50±0.01      | 3.05±0.03       | 1.90±0.01                |
| RA1700103 | 109BWA1BWA-1       | 36.43±0.02    | 20.76±0.03 | 19.15±0.05    | 6.72±0.01    | 5.71±0.018   | 2.24±0.00      | 3.10±0.01       | 2.81±0.00                |
| RA1700104 | 20Acc118CIV-B      | 35.80±0.02    | 23.95±0.01 | 16.51±0.01    | 7.19±0.00    | 6.02±0.012   | 2.31±0.01      | 2.80±0.02       | 2.17±0.00                |
| RA1700105 | 56Acc89MLI-C       | 36.96±0.03    | 24.16±0.09 | 17.18±0.03    | 8.29±0.01    | 4.42±0.003   | 2.48±0.01      | 1.44±0.00       | 2.34±0.05                |
| RA1700106 | 84ACC696ZMB-2      | 37.86±0.10    | 20.51±0.10 | 16.76±0.03    | 7.03±0.02    | 6.85±0.057   | 2.35±0.01      | 3.50±0.03       | 2.11±0.01                |
| RA1700107 | 99SB4-2NAM-A       | 34.22±0.05    | 24.38±0.04 | 16.64±0.03    | 6.71±0.02    | 6.85±0.022   | 2.19±0.00      | 3.60±0.02       | 2.04±0.02                |
| RA1700108 | 60ACC32NGA-A       | 38.46±0.49    | 17.52±0.28 | 18.66±0.05    | 11.40±0.04   | 4.95±0.052   | 3.28±0.02      | 1.49±0.03       | 2.41±0.14                |
| RA1700109 | 1-76ACC390SDN-CA11 | 39.27±0.09    | 20.53±0.01 | 18.74±0.06    | 8.43±0.03    | 3.89±0.014   | 2.35±0.09      | 1.49±0.01       | 2.28±0.13                |

|           |                         |            |            |             |            |            |           |           |           |
|-----------|-------------------------|------------|------------|-------------|------------|------------|-----------|-----------|-----------|
| RA1700110 | 91UNISRSWA-B            | 36.69±0.21 | 22.68±0.12 | 17.12±0.01  | 6.33±0.03  | 6.22±0.001 | 2.17±0.01 | 3.21±0.01 | 2.26±0.07 |
| RA1700111 | 92AHM968NAM-C           | 35.98±0.05 | 21.52±0.11 | 16.74±0.09  | 6.55±0.05  | 7.36±0.060 | 2.20±0.01 | 3.70±0.10 | 2.28±0.10 |
| RA1700112 | Ankpa4                  | 45.64±0.15 | 17.00±0.06 | 19.51±0.05  | 2.44±0.01  | 3.42±0.024 | 0.90±0.00 | 2.80±0.01 | 4.54±0.01 |
| RA1700113 | BC12105                 | 35.27±0.01 | 24.99±0.49 | 17.97±0.02  | 6.98±0.00  | 5.28±0.004 | 2.13±0.00 | 2.57±0.02 | 1.96±0.01 |
| RA1700114 | BC31107                 | 36.90±0.01 | 21.48±0.11 | 20.21±0.02  | 6.39±0.01  | 4.81±0.012 | 2.11±0.00 | 2.29±0.01 | 2.93±0.00 |
| RA1700115 | BCGC12107               | 33.00±0.02 | 28.32±0.56 | 16.65±0.02  | 6.97±0.01  | 5.50±0.011 | 2.12±0.01 | 2.68±0.01 | 1.68±0.00 |
| RA1700116 | BCGC23107               | 34.36±0.01 | 26.49±0.49 | 17.63±0.05  | 7.15±0.01  | 5.19±0.016 | 2.18±0.01 | 2.40±0.00 | 1.85±0.02 |
| RA1700117 | BCL33107                | 37.00±0.03 | 21.85±0.05 | 19.96±0.06  | 6.60±0.01  | 4.66±0.010 | 2.16±0.01 | 1.78±0.50 | 2.87±0.00 |
| RA1700118 | BH16107                 | 36.47±0.04 | 23.33±0.26 | 19.15±0.03  | 6.47±0.01  | 5.08±0.013 | 2.13±0.01 | 2.33±0.02 | 2.77±0.00 |
| RA1700119 | BH17107                 | 35.52±0.15 | 25.15±0.41 | 17.545±0.15 | 6.47±0.04  | 5.78±0.031 | 2.10±0.01 | 3.09±0.01 | 2.06±0.01 |
| RA1700120 | BD                      | 34.63±0.05 | 24.88±0.38 | 17.67±0.14  | 6.30±0.04  | 6.32±0.13  | 2.22±0.21 | 3.53±0.39 | 1.87±0.22 |
| RA1700121 | Bogor                   | 38.65±0.04 | 18.08±0.04 | 20.64±0.05  | 6.31±0.02  | 4.93±0.02  | 2.19±0.01 | 2.41±0.01 | 3.77±0.00 |
| RA1700122 | Burkina                 | 41.55±0.22 | 17.57±0.09 | 18.89±0.05  | 8.03±0.04  | 4.47±0.03  | 2.51±0.02 | 1.23±0.01 | 2.77±0.01 |
| RA1700123 | Cikur 2.1               | 35.11±0.11 | 26.15±0.61 | 17.71±0.08  | 5.56±0.02  | 5.67±0.08  | 1.87±0.04 | 3.34±0.11 | 1.99±0.02 |
| RA1700124 | Cikur 2.3               | 36.32±0.21 | 26.90±0.18 | 17.32±0.02  | 6.53±0.03  | 4.42±0.05  | 2.06±0.01 | 2.42±0.03 | 2.06±0.10 |
| RA1700125 | Cikur 3.3               | 35.17±0.05 | 27.08±0.03 | 17.33±0.01  | 6.40±0.01  | 5.34±0.01  | 1.97±0.00 | 2.84±0.05 | 1.75±0.01 |
| RA1700126 | Cream Grey Eye-49       | 35.51±0.22 | 23.33±0.37 | 16.19±0.07  | 10.86±0.07 | 5.34±0.03  | 3.19±0.02 | 1.69±0.01 | 2.51±0.01 |
| RA1700127 | Cream Light Brown Eye   | 39.64±0.11 | 18.70±0.21 | 19.27±0.03  | 8.12±0.03  | 5.22±0.02  | 2.53±0.02 | 1.69±0.02 | 2.79±0.01 |
| RA1700128 | Cream with black splash | 39.08±0.21 | 18.32±0.12 | 18.24±0.11  | 9.21±0.03  | 4.93±0.02  | 2.75±0.02 | 2.03±0.01 | 3.44±0.02 |
| RA1700129 | DipC_CFF                | 36.79±0.05 | 21.98±0.03 | 17.02±0.02  | 6.65±0.06  | 6.92±0.04  | 2.24±0.01 | 2.53±0.02 | 2.50±0.02 |
| RA1700130 | DipC_UoN                | 39.34±0.29 | 18.78±0.23 | 20.37±0.13  | 4.39±0.00  | 5.28±0.02  | 1.57±0.01 | 2.28±0.00 | 2.94±0.01 |
| RA1700131 | DodR_CFF                | 35.26±0.15 | 20.93±0.33 | 17.46±0.06  | 9.01±0.10  | 7.11±0.050 | 2.91±0.02 | 2.78±0.02 | 2.55±0.01 |
| RA1700132 | DodR_UoN                | 36.44±0.86 | 18.83±0.69 | 18.84±0.31  | 6.47±0.14  | 6.44±0.08  | 2.15±0.03 | 3.33±0.08 | 2.33±0.04 |
| RA1700133 | DBB                     | 42.19±0.01 | 17.85±0.24 | 19.98±0.03  | 7.59±0.03  | 4.12±0.01  | 2.29±0.01 | 1.13±0.01 | 2.91±0.00 |
| RA1700134 | Exsokoto                | 40.65±0.06 | 15.84±0.04 | 21.31±0.00  | 8.71±0.05  | 4.67±0.01  | 2.82±0.01 | 1.64±0.00 | 2.43±0.01 |
| RA1700135 | Exsokoto-39             | 40.88±0.17 | 16.45±0.10 | 20.17±0.08  | 9.93±0.05  | 4.25±0.02  | 2.96±0.01 | 1.30±0.15 | 2.16±0.02 |
| RA1700136 | Exsokoto-177            | 40.40±0.13 | 14.85±0.17 | 21.54±0.10  | 8.46±0.04  | 5.17±0.02  | 2.89±0.02 | 1.90±0.01 | 2.94±0.01 |
| RA1700137 | Exsokoto-183            | 40.92±0.55 | 16.51±0.39 | 19.52±0.30  | 8.29±0.10  | 4.85±0.46  | 2.71±0.02 | 2.13±0.51 | 2.53±0.05 |
| RA1700138 | GC11105                 | 32.06±0.07 | 27.14±0.02 | 16.68±0.03  | 6.20±0.02  | 6.21±0.01  | 1.97±0.01 | 4.10±0.03 | 1.64±0.00 |
| RA1700139 | GC32105                 | 33.31±0.42 | 24.73±0.04 | 17.15±0.06  | 7.59±0.10  | 6.27±0.10  | 2.40±0.04 | 3.35±0.08 | 1.87±0.05 |
| RA1700140 | GC35107                 | 33.31±0.18 | 29.21±0.08 | 17.06±0.05  | 6.40±0.01  | 5.06±0.02  | 1.88±0.03 | 2.76±0.06 | 1.59±0.02 |

|           |                   |            |            |            |           |           |           |           |           |
|-----------|-------------------|------------|------------|------------|-----------|-----------|-----------|-----------|-----------|
| RA1700141 | GCL13105          | 33.55±0.01 | 25.18±0.03 | 16.78±0.03 | 6.65±0.02 | 6.19±0.01 | 2.12±0.01 | 4.07±0.02 | 1.79±0.00 |
| RA1700142 | Getso             | 45.23±0.00 | 14.62±0.00 | 23.27±0.01 | 4.35±0.00 | 3.49±0.00 | 1.46±0.00 | 1.65±0.00 | 3.37±0.00 |
| RA1700143 | GH17105           | 32.89±0.40 | 26.36±0.12 | 16.52±0.22 | 6.82±0.14 | 5.91±0.17 | 2.06±0.02 | 3.79±0.20 | 1.71±0.02 |
| RA1700144 | GH21105           | 33.79±0.27 | 27.78±0.15 | 17.29±0.09 | 6.56±0.05 | 5.39±0.02 | 2.35±0.27 | 2.64±0.05 | 1.82±0.02 |
| RA1700145 | GH36107           | 32.85±0.14 | 24.89±0.12 | 17.19±0.14 | 6.48±0.05 | 6.50±0.19 | 2.15±0.01 | 4.24±0.20 | 1.89±0.01 |
| RA1700146 | GH37107           | 32.06±0.12 | 26.69±0.07 | 16.51±0.07 | 6.87±0.02 | 6.37±0.12 | 2.14±0.01 | 3.99±0.14 | 1.56±0.01 |
| RA1700147 | GHC36105          | 36.86±0.15 | 20.47±0.03 | 19.42±0.10 | 6.68±0.03 | 5.34±0.12 | 2.27±0.01 | 3.03±0.10 | 3.08±0.03 |
| RA1700148 | Gresik_CFF_2016   | 36.55±0.19 | 21.24±0.88 | 18.79±0.25 | 6.48±0.14 | 5.42±0.09 | 2.17±0.05 | 3.13±0.06 | 3.23±0.32 |
| RA1700149 | Gresik_UoN        | 38.16±0.04 | 20.30±0.02 | 21.92±0.03 | 3.41±0.01 | 4.54±0.02 | 1.25±0.00 | 3.08±0.02 | 3.48±0.00 |
| RA1700150 | GOBRAS2.2         | 34.89±0.12 | 23.91±0.03 | 16.08±0.09 | 6.15±0.01 | 6.76±0.11 | 2.10±0.01 | 4.50±0.15 | 1.79±0.02 |
| RA1700151 | IITA686_CFF       | 36.68±0.24 | 18.59±0.09 | 16.97±0.16 | 7.88±0.09 | 6.78±0.19 | 2.56±0.03 | 4.27±0.22 | 3.04±0.02 |
| RA1700152 | IITA686_UoN       | 40.40±0.24 | 17.89±0.12 | 19.32±0.13 | 3.79±0.04 | 4.50±0.03 | 1.33±0.01 | 3.20±0.06 | 3.29±0.01 |
| RA1700153 | IPB Bam-1         | 33.66±0.18 | 25.70±0.13 | 15.96±0.11 | 5.75±0.02 | 6.44±0.16 | 1.94±0.01 | 4.65±0.22 | 1.69±0.01 |
| RA1700154 | IPB Bam-2         | 33.78±0.09 | 25.31±0.07 | 16.13±0.04 | 5.85±0.02 | 6.51±0.08 | 1.98±0.00 | 4.11±0.01 | 1.86±0.11 |
| RA1700155 | IPB Bam-5         | 33.66±0.67 | 25.30±0.19 | 16.50±0.19 | 6.39±0.08 | 6.53±0.07 | 2.12±0.04 | 4.11±0.01 | 1.58±0.09 |
| RA1700156 | IPB Bam-6         | 34.71±0.38 | 22.55±0.27 | 18.34±0.45 | 5.57±0.58 | 5.89±0.51 | 1.89±0.09 | 4.73±0.04 | 2.56±0.19 |
| RA1700157 | IPB Bam-10        | 34.02±0.11 | 24.81±0.08 | 16.21±0.07 | 6.15±0.02 | 6.50±0.11 | 2.05±0.01 | 4.56±0.09 | 1.77±0.01 |
| RA1700158 | Kaaro-x           | 40.47±0.09 | 17.72±0.02 | 18.73±0.04 | 8.44±0.02 | 4.77±0.03 | 2.53±0.02 | 1.92±0.01 | 3.21±0.01 |
| RA1700159 | Kaaro-4           | 41.29±0.59 | 16.50±0.17 | 18.98±0.09 | 8.35±0.10 | 4.99±0.10 | 2.52±0.05 | 2.21±0.07 | 2.91±0.04 |
| RA1700160 | Kaaro-66          | 42.23±0.02 | 16.68±0.01 | 17.46±0.01 | 8.95±0.01 | 5.34±0.16 | 2.68±0.00 | 1.65±0.00 | 2.63±0.01 |
| RA1700161 | Kaaro-74          | 41.88±0.19 | 16.40±0.02 | 17.71±0.02 | 9.11±0.02 | 5.31±0.05 | 2.75±0.02 | 1.63±0.01 | 2.66±0.01 |
| RA1700162 | Kano2             | 42.41±0.06 | 15.35±0.09 | 23.52±0.03 | 5.21±0.01 | 3.91±0.03 | 1.66±0.01 | 1.75±0.01 | 3.35±0.00 |
| RA1700163 | Kano3             | 42.56±0.10 | 20.97±0.05 | 20.42±0.05 | 4.25±0.00 | 3.17±0.01 | 1.33±0.00 | 1.10±0.00 | 3.09±0.01 |
| RA1700164 | LunT              | 36.68±0.15 | 23.53±0.07 | 16.55±0.03 | 7.92±0.02 | 5.45±0.04 | 2.41±0.01 | 2.74±0.02 | 1.77±0.01 |
| RA1700165 | LBLBE             | 37.75±0.03 | 17.23±0.02 | 19.71±0.02 | 8.90±0.01 | 5.26±0.04 | 2.68±0.01 | 2.09±0.02 | 3.16±0.00 |
| RA1700166 | Mottled Black     | 37.19±0.08 | 19.09±0.16 | 18.81±0.15 | 8.54±0.03 | 4.33±0.01 | 2.48±0.00 | 2.48±0.02 | 4.25±0.02 |
| RA1700167 | Nav4-13 (NAV0983) | 39.36±0.02 | 16.37±0.01 | 19.51±0.05 | 8.71±0.00 | 5.65±0.02 | 2.72±0.01 | 1.57±0.00 | 3.24±0.00 |
| RA1700168 | Rajap 3.2         | 38.17±0.16 | 23.42±0.01 | 17.73±0.08 | 6.44±0.37 | 4.14±0.02 | 2.09±0.0  | 2.38±0.01 | 2.08±0.02 |
| RA1700169 | S19-3_CFF         | 35.35±0.95 | 21.20±0.59 | 18.10±0.20 | 7.47±0.01 | 5.81±0.16 | 2.35±0.06 | 3.39±0.09 | 2.72±0.07 |
| RA1700170 | S19-3_UoN         | 39.01±0.43 | 18.33±0.15 | 21.58±0.27 | 4.24±0.02 | 4.38±0.04 | 1.45±0.02 | 3.23±0.11 | 3.44±0.03 |
| RA1700171 | Situraja2         | 38.54±0.32 | 23.08±0.19 | 17.44±0.34 | 6.73±0.06 | 4.44±0.04 | 2.11±0.02 | 2.42±0.15 | 2.22±0.18 |

|             |                       |             |            |            |           |           |            |           |            |
|-------------|-----------------------|-------------|------------|------------|-----------|-----------|------------|-----------|------------|
| RA1700172   | Songkhla-1            | 37.74±0.06  | 21.28±0.01 | 18.30±0.03 | 6.51±0.02 | 6.07±0.02 | 2.13±0.01  | 2.05±0.01 | 2.40±0.02  |
| RA1700173   | Songkhla-1-38         | 37.39±1.40  | 21.79±1.00 | 18.86±0.23 | 6.24±0.02 | 5.37±0.18 | 2.03±0.007 | 1.67±0.06 | 2.30±0.22  |
| RA1700174   | Songkhla-1-72         | 36.11±1.49  | 22.43±0.94 | 18.82±0.24 | 6.66±0.08 | 5.47±0.24 | 2.05±0.09  | 1.69±0.08 | 2.26±0.09  |
| RA1700175   | Songkhla-1-90         | 37.66±0.08  | 20.87±0.04 | 18.52±0.07 | 6.81±0.01 | 6.16±0.09 | 2.24±0.02  | 1.93±0.04 | 2.37±0.02  |
| RA1700176   | Sukuraja-2            | 37.27±0.07  | 22.66±0.06 | 17.53±0.04 | 7.73±0.03 | 4.64±0.05 | 2.46±0.01  | 2.22±0.03 | 2.08±0.0   |
| RA1700177   | Thung yang dang       | 36.26±0.02  | 22.85±0.01 | 18.86±0.04 | 6.25±0.01 | 5.30±0.01 | 2.00±0.01  | 2.70±0.00 | 2.35±0.00  |
| RA1700178   | Tiga Nicaru           | 40.68±0.62  | 18.57±0.30 | 21.49±0.35 | 5.59±0.06 | 4.03±0.01 | 1.83±0.02  | 1.50±0.08 | 2.91±0.02  |
| RA1700179   | TVSU738               | 40.47±0.03  | 20.08±0.07 | 19.17±0.10 | 8.27±0.05 | 4.03±0.03 | 2.21±0.02  | 1.05±0.00 | 1.90±0.020 |
| RA1700180   | TVSU89                | 38.88±0.17  | 21.74±0.52 | 18.62±0.09 | 7.77±0.03 | 3.81±0.03 | 2.30±0.02  | 1.59±0.01 | 3.01±0.02  |
| RA1700181   | TVSu880               | 43.20±0.01  | 18.26±0.06 | 21.44±0.05 | 3.29±0.02 | 4.23±0.05 | 1.20±0.02  | 3.25±0.05 | 3.19±0.12  |
| RA1700182   | TVSu879               | 42.83±0.03  | 18.89±0.02 | 20.64±0.10 | 3.49±0.00 | 4.83±0.02 | 1.25±0.00  | 2.51±0.02 | 3.50±0.01  |
| RA1700183   | TVSu702               | 40.52±0.06  | 19.32±0.03 | 21.59±0.03 | 4.51±0.01 | 5.44±0.01 | 1.60±0.00  | 2.84±0.00 | 2.22±0.00  |
| RA1700184   | TVSU 334              | 43.92±0.14  | 19.99±0.08 | 18.74±0.06 | 4.48±0.02 | 3.95±0.01 | 1.54±0.00  | 2.16±0.01 | 2.93±0.01  |
| RA1700185   | TVSU 922              | 42.43±0.02  | 20.19±0.00 | 19.93±0.02 | 3.31±0.00 | 4.43±0.00 | 1.18±0.00  | 2.99±0.00 | 3.35±0.00  |
| RA1700186   | TVSU 924              | 41.09±0.01  | 20.73±0.70 | 19.08±0.01 | 4.47±0.00 | 4.92±0.00 | 1.52±0.01  | 3.10±0.00 | 2.87±0.57  |
| RA1700187   | TVSu 323              | 45.09±0.00  | 20.69±0.04 | 19.30±0.02 | 2.85±0.00 | 3.71±0.00 | 1.05±0.00  | 1.67±0.00 | 3.57±0.00  |
| RA1700188   | TVSU1023              | 44.44±0.06  | 15.89±0.03 | 20.71±0.03 | 4.29±0.00 | 4.99±0.00 | 1.49±0.00  | 2.91±0.00 | 2.54±0.00  |
| RA1700189   | TVSU1033              | 44.74±0.96  | 14.05±0.02 | 22.09±0.02 | 3.68±0.00 | 4.29±0.01 | 1.29±0.00  | 2.92±0.02 | 3.63±0.00  |
| RA1700190   | TVSU 1231             | 48.286±0.04 | 14.57±0.01 | 20.87±0.01 | 3.59±0.00 | 3.70±0.01 | 1.27±0.00  | 1.39±0.00 | 4.64±0.00  |
| RA1700191   | TVSU702-2018          | 39.996±0.10 | 18.36±0.24 | 20.95±0.03 | 5.21±0.07 | 4.58±0.05 | 1.68±0.02  | 2.55±0.04 | 3.50±0.11  |
| RA1700192   | TVSU879-2018          | 40.892±0.17 | 18.26±0.07 | 20.38±0.04 | 5.08±0.02 | 4.81±0.03 | 1.74±0.02  | 1.90±0.02 | 4.16±0.09  |
| RA1700193   | TVSU880-2018          | 40.680±0.25 | 16.45±0.05 | 21.39±0.14 | 5.00±0.00 | 4.20±0.03 | 1.75±0.01  | 2.47±0.2  | 4.99±0.03  |
| RA1700194   | Uniswa Red            | 36.312±0.12 | 22.14±0.02 | 17.89±0.18 | 6.66±0.01 | 6.70±0.18 | 2.15±0.03  | 2.49±0.10 | 2.44±0.04  |
| RA1700195   | Uniswa Red_AB_CFF     | 36.184±0.28 | 21.70±0.11 | 16.86±0.05 | 6.85±0.01 | 7.05±0.13 | 2.26±0.00  | 2.85±0.02 | 2.65±0.15  |
| RA1700196   | Uniswa Red_Red_UoN    | 38.525±0.05 | 21.76±0.04 | 19.33±0.05 | 3.76±0.01 | 5.67±0.00 | 1.32±0.01  | 3.27±0.0  | 2.40±0.02  |
| RA1700197   | Uniswa Red_Green_UoN  | 41.422±0.09 | 17.10±0.04 | 22.06±0.05 | 3.10±0.01 | 3.89±0.03 | 1.17±0.00  | 3.24±0.01 | 4.00±0.01  |
| RA1700198   | URUG2(1)              | 33.897±0.38 | 25.32±0.16 | 18.17±0.02 | 6.82±0.01 | 5.47±0.06 | 2.05±0.03  | 2.70±0.03 | 1.80±0.02  |
| RA1700199   | Zebra Cream-8         | 38.444±0.10 | 20.84±0.03 | 17.57±0.05 | 9.41±0.01 | 4.87±0.05 | 2.68±0.02  | 1.89±0.04 | 2.76±0.01  |
| RA1700200   | Zebra Cream-10 (KM10) | 39.420±0.03 | 18.58±0.02 | 18.92±0.23 | 8.54±0.40 | 5.01±0.03 | 2.62±0.00  | 1.91±0.01 | 3.03±0.01  |
| Overall Min |                       | 31.95       | 14.04      | 15.87      | 2.43      | 3.17      | 0.90       | 1.05      | 1.48       |



|                                  |       |       |       |       |      |      |      |      |
|----------------------------------|-------|-------|-------|-------|------|------|------|------|
| Overall Max                      | 48.33 | 29.29 | 23.56 | 11.43 | 7.39 | 3.31 | 4.83 | 5.02 |
| Overall Mean                     | 38.02 | 20.85 | 18.68 | 6.78  | 5.25 | 2.18 | 2.53 | 2.65 |
| Overall standard deviation       | 3.29  | 3.48  | 1.65  | 1.78  | 0.91 | 0.49 | 0.85 | 0.67 |
| Significance of line differences | **    | **    | **    | **    | **   | **   | **   | **   |

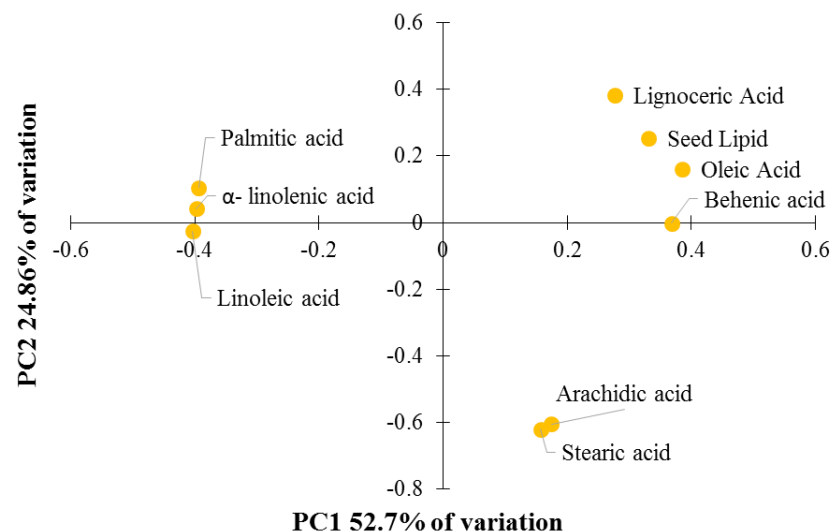

**Figure S1:** Principal Component Analysis (PCA) loading plot for seed lipid concentration (g/100g dry weight) and eight fatty acids for the global diversity set of 100 bambara groundnut lines. Input data were mean values calculated from three technical replicates expressed as % of total fatty acid (Table S3). PCA conducted on the correlation matrix.

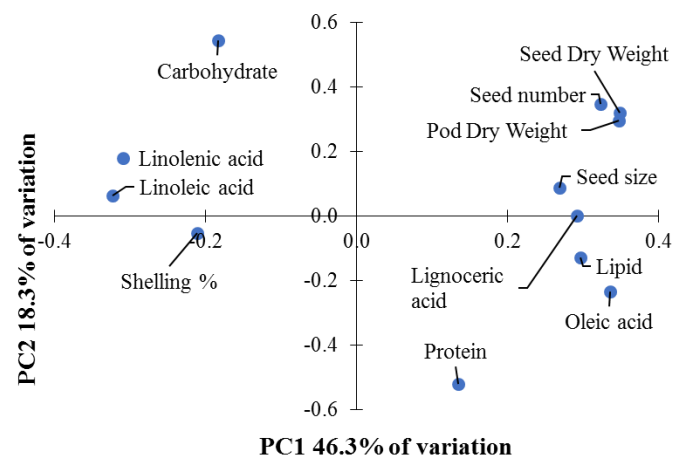

**Figure S2:** PCA loading plot of agronomic (seed number, pod dry weight, seed dry weight, and seed size, shelling percentage) and nutritional traits (seed lipid, protein, carbohydrate, oleic acid, lignoceric acid, linoleic acid, and linolenic acid) selected for selection indices dataset of 40 bambara groundnut lines. Principal component analysis was conducted on the correlation matrix.

**Table S3:** Scenario scores calculated from SND values presented in for all 15 scenarios tested for the 5 selection indices: 1) Seed lipid 2) omega 3 & 6 fatty acids 3) seed lipid & yield 4) omega 3 & 6 fatty acids & yield components, and 5) yield. Description of each index and scenario is presented in Table 5.1. SI = Selection index, DBB=Dotted brown/black eye, LBLBE=Light brown/light brown eye.

| Line ID   | Line name          | Selection Index & scenario |       |       |       |       |       |       |       |       |       |       |       |       |       |       |
|-----------|--------------------|----------------------------|-------|-------|-------|-------|-------|-------|-------|-------|-------|-------|-------|-------|-------|-------|
|           |                    | SI 1                       |       |       | SI 2  |       |       |       | SI 3  |       |       |       | SI 4  |       |       |       |
|           |                    | 1a                         | 2a    | 3a    | 3b    | 3c    | 3d    | 4a    | 4b    | 4c    | 4d    | 5a    | 5b    | 5c    | 5d    | 5e    |
| RA1700101 | 100SB16ANMAM-CA-16 | 1.64                       | -1.27 | 0.87  | -0.23 | 0.65  | -0.12 | -2.05 | -3.15 | -2.26 | -3.03 | -1.99 | -1.76 | -3.09 | -2.53 | -4.41 |
| RA1700102 | 104S-1913NAM       | 3.29                       | -1.42 | 4.01  | 3.05  | 4.99  | 5.71  | -0.70 | -1.66 | 0.28  | 1.00  | 3.42  | 4.06  | 2.46  | 4.78  | 4.54  |
| RA1700103 | 109BWA1BWA-1       | 3.66                       | 7.12  | 4.41  | 3.80  | 4.19  | 4.94  | 7.87  | 7.26  | 7.66  | 8.39  | 4.56  | 4.94  | 3.95  | 5.69  | 5.83  |
| RA1700104 | 20Acc118CIV-B      | -0.05                      | -3.04 | -0.71 | -1.14 | -0.23 | -0.89 | -3.70 | -4.13 | -3.22 | -3.8  | -1.76 | -1.70 | -2.19 | -2.35 | -3.44 |
| RA1700105 | 56Acc89MLI-C       | 2.86                       | 1.35  | 3.26  | 2.51  | 3.76  | 4.15  | 1.75  | 1.00  | 2.24  | 2.64  | 1.39  | 2.14  | 0.65  | 2.54  | 2.20  |
| RA1700106 | 84ACC696ZMB-2      | 2.46                       | 2.58  | 2.99  | 2.04  | 3.55  | 4.06  | 3.10  | 2.15  | 3.65  | 4.18  | 3.75  | 4.47  | 2.81  | 4.99  | 4.57  |
| RA1700107 | 99SB4-2NAM-A       | 6.57                       | 1.69  | 7.30  | 6.32  | 7.12  | 7.86  | 2.43  | 1.44  | 2.24  | 2.98  | 4.73  | 5.36  | 3.74  | 6.10  | 5.85  |
| RA1700108 | 60ACC32NGA-A       | -6.13                      | -1.83 | -6.38 | -5.75 | -7.00 | -7.25 | -2.08 | -1.46 | -2.70 | -2.95 | -3.93 | -3.99 | -3.30 | -4.24 | -3.87 |

|           |                       |       |       |       |       |       |       |       |       |       |       |       |       |       |       |       |
|-----------|-----------------------|-------|-------|-------|-------|-------|-------|-------|-------|-------|-------|-------|-------|-------|-------|-------|
| RA1700109 | 1-76Acc390 SDN-C A-11 | -6.36 | -4.53 | -7.09 | -7.28 | -6.63 | -7.35 | -5.25 | -5.45 | -4.79 | -5.52 | -5.84 | -5.71 | -6.04 | -6.44 | -7.36 |
| RA1700110 | 91UNISRSWA-B          | 2.12  | 1.02  | 2.33  | 2.39  | 2.52  | 2.73  | 1.22  | 1.28  | 1.41  | 1.62  | 1.96  | 1.93  | 2.02  | 2.14  | 2.41  |
| RA1700111 | 92AHM968NAM-C         | 1.92  | 1.39  | 2.04  | 1.41  | 2.45  | 2.58  | 1.52  | 0.88  | 1.93  | 2.05  | 2.10  | 2.68  | 1.46  | 2.80  | 2.30  |
| RA1700114 | BC31107               | 1.20  | 5.13  | 0.58  | 2.39  | -0.80 | -1.42 | 4.51  | 6.32  | 3.13  | 2.52  | -0.31 | -0.54 | 1.49  | -1.16 | 0.03  |
| RA1700116 | BCGC 23107            | 3.69  | -3.76 | 3.15  | 3.87  | 1.91  | 1.38  | -4.30 | -3.58 | -5.53 | -6.06 | -1.19 | -1.31 | -0.48 | -1.84 | -1.66 |
| RA1700118 | BH 16107              | 2.11  | -0.32 | 1.59  | 3.32  | 0.12  | -0.39 | -0.84 | 0.88  | -2.30 | -2.83 | -0.67 | -0.90 | 1.06  | -1.42 | -0.22 |
| RA1700120 | BD                    | 6.66  | 0.62  | 7.00  | 8.02  | 6.71  | 7.05  | 0.96  | 1.99  | 0.68  | 1.02  | 4.88  | 4.60  | 5.91  | 4.94  | 6.31  |
| RA1700239 | Burkina_2016          | -5.53 | 0.56  | -6.34 | -7.36 | -6.18 | -6.99 | -0.25 | -1.28 | -0.09 | -0.90 | -4.35 | -4.39 | -5.37 | -5.20 | -7.04 |
| RA1700123 | Cikur 2.1             | 3.20  | -2.73 | 2.75  | 3.36  | 3.51  | 3.06  | -3.18 | -2.57 | -2.42 | -2.87 | 0.59  | 0.51  | 1.20  | 0.07  | 0.23  |
| RA1700126 | Cream Grey Eye-49     | -2.34 | -2.98 | -3.00 | -3.19 | -3.37 | -4.03 | -3.64 | -3.83 | -4.02 | -4.67 | -4.41 | -4.41 | -4.61 | -5.07 | -5.93 |
| RA1700127 | Cream Light Brown Eye | -5.86 | 0.58  | -6.64 | -7.05 | -7.47 | -8.25 | -0.19 | -0.60 | -1.02 | -1.80 | -5.19 | -5.28 | -5.60 | -6.06 | -7.25 |
| RA1700129 | DipC_CFF              | -1.85 | -0.95 | -2.54 | -2.80 | -3.79 | -4.48 | -1.63 | -1.90 | -2.89 | -3.58 | -3.88 | -3.89 | -4.14 | -4.58 | -5.53 |
| RA1700131 | DodR_CFF              | 1.03  | 2.21  | 1.88  | 1.97  | 2.69  | 3.54  | 3.06  | 3.15  | 3.86  | 4.72  | 3.43  | 3.33  | 3.52  | 4.18  | 5.12  |
| RA1700133 | DBB                   | -6.24 | 2.81  | -6.97 | -6.70 | -7.47 | -8.20 | 2.09  | 2.35  | 1.58  | 0.85  | -4.57 | -4.70 | -4.30 | -5.43 | -5.89 |
| RA1700135 | Exsokoto-39           | -7.29 | -2.53 | -7.95 | -6.70 | -9.08 | -9.74 | -3.18 | -1.93 | -4.31 | -4.97 | -5.13 | -5.33 | -3.88 | -5.99 | -5.40 |
| RA1700146 | GH37107               | 9.72  | -0.79 | 11.90 | 11.07 | 13.05 | 15.24 | 1.39  | 0.56  | 2.54  | 4.73  | 10.10 | 9.68  | 9.26  | 11.87 | 13.22 |
| RA1700147 | GHC36105              | 6.87  | 12.38 | 9.81  | 8.06  | 10.32 | 13.27 | 15.3  | 13.5  | 15.84 | 18.79 | 11.70 | 11.28 | 9.94  | 14.23 | 15.41 |
| RA1700151 | IITA686_CFF_2016      | 0.05  | 6.54  | -0.54 | -0.95 | -1.20 | -1.80 | 5.94  | 5.54  | 5.284 | 4.69  | 0.93  | 1.05  | 0.53  | 0.46  | -0.54 |
| RA1700153 | IPB Bam-1             | 10.81 | 2.59  | 12.70 | 13.11 | 12.24 | 14.13 | 4.48  | 4.89  | 4.02  | 5.92  | 10.39 | 9.56  | 10.80 | 11.46 | 13.76 |
| RA1700154 | IPB Bam-2             | 10.83 | 3.98  | 13.60 | 12.48 | 13.47 | 16.24 | 6.75  | 5.63  | 6.62  | 9.40  | 11.68 | 11.06 | 10.55 | 13.83 | 15.48 |
| RA1700155 | IPB Bam-6             | 3.44  | 3.26  | 2.98  | 3.34  | 2.67  | 2.21  | 2.81  | 3.17  | 2.504 | 2.05  | 2.21  | 2.18  | 2.57  | 1.73  | 1.63  |
| RA1700160 | Kaaro-66              | -7.31 | 0.86  | -7.99 | -7.79 | -8.66 | -9.34 | 0.18  | 0.38  | -0.48 | -1.16 | -4.98 | -5.05 | -4.78 | -5.75 | -6.22 |
| RA1700164 | LunT_CFF              | 0.04  | -4.59 | 0.89  | 0.24  | 2.98  | 3.82  | -3.75 | -4.39 | -1.66 | -0.81 | 1.16  | 1.80  | 0.52  | 2.65  | 2.85  |
| RA1700165 | LBLBE                 | -5.75 | 2.98  | -6.49 | -6.82 | -7.56 | -8.29 | 2.25  | 1.92  | 1.176 | 0.44  | -4.31 | -4.36 | -4.64 | -5.09 | -6.15 |
| RA1700166 | Mottle Black_2016     | -1.02 | 12.79 | -1.66 | -1.15 | -2.45 | -3.09 | 12.16 | 12.67 | 11.36 | 10.73 | -0.43 | -0.54 | 0.077 | -1.18 | -1.30 |
| RA1700167 | Nav4-13               | -5.89 | 4.76  | -6.55 | -6.00 | -7.47 | -8.14 | 4.09  | 4.64  | 3.17  | 2.50  | -3.53 | -3.67 | -2.98 | -4.34 | -4.45 |
| RA1700168 | Rajap 3.2             | 0.34  | -1.58 | 0.81  | 2.29  | 3.15  | 3.62  | -1.11 | 0.36  | 1.23  | 1.70  | 2.50  | 2.06  | 3.98  | 2.53  | 4.47  |
| RA1700169 | S19-3                 | -3.37 | -1.29 | -4.21 | -3.17 | -1.57 | -2.41 | -2.12 | -1.08 | 0.52  | -0.31 | -0.90 | -1.12 | 0.14  | -1.96 | -1.76 |
| RA1700172 | Songhklal             | -4.35 | -3.07 | -4.99 | -5.62 | -3.66 | -4.30 | -3.71 | -4.34 | -2.38 | -3.02 | -3.44 | -3.27 | -4.06 | -3.91 | -5.18 |
| RA1700180 | TVSU89                | -0.79 | 4.47  | -1.48 | -0.41 | -2.26 | -2.95 | 3.78  | 4.85  | 2.99  | 2.31  | -2.00 | -2.19 | -0.93 | -2.88 | -2.50 |
| RA1700194 | Uniswa Red UR343      | -1.88 | -1.69 | -2.49 | -1.71 | -1.82 | -2.43 | -2.30 | -1.52 | -1.64 | -2.24 | -1.89 | -2.03 | -1.12 | -2.63 | -2.46 |
| RA1700200 | Zebra Cream-10        | -3.64 | 4.19  | -4.03 | -4.40 | -4.60 | -4.99 | 3.81  | 3.44  | 3.233 | 2.85  | -2.60 | -2.34 | -2.97 | -2.72 | -3.48 |

**Table S4:** Scenario scores for the bambara groundnut lines with the highest 15 scores for scenario with each selection index. Description of each scenario tested within each index is as described in Table 5.1. One scenario was tested each for selection index 1 and 2; four scenarios were tested for selection index 3 and five scenarios were tested for selection index 5. For selection index 3 and 4, the two scenarios with the highest scores are shown. For selection index 5, the three scenarios with the highest scores are shown. DBB=Dotted brown/black eye, LBLBE=Light brown/light brown eye.

| <b>Selection index 1: Seed lipid</b>                              |                       | <b>Selection index 2: Omega 3 &amp; 6 fatty acid</b> |                       | <b>Selection index 3: Seed lipid &amp; yield</b>         |                            |                            |
|-------------------------------------------------------------------|-----------------------|------------------------------------------------------|-----------------------|----------------------------------------------------------|----------------------------|----------------------------|
| <i>Scenario:</i> Oleic acid                                       |                       | <i>Scenario:</i> Linoleic and linolenic acid         |                       | <i>Scenarios:</i> a) Oleic acid & 1 yield component      |                            |                            |
| <i>Traits selected:</i> Oleic acid                                |                       | <i>Traits selected:</i> Linoleic and linolenic acid  |                       | b) Oleic acid & 2 yield components                       |                            |                            |
|                                                                   |                       |                                                      |                       | <i>Traits</i> a) Oleic acid, seed weight                 |                            |                            |
|                                                                   |                       |                                                      |                       | <i>selected:</i> b) Oleic acid, seed number, seed weight |                            |                            |
| <i>Bambara groundnut line</i>                                     | <i>Scenario score</i> | <i>Bambara groundnut line</i>                        | <i>Scenario score</i> | <i>Bambara groundnut line</i>                            | <i>Scenario score (3a)</i> | <i>Scenario score (3b)</i> |
| IPB Bam-2                                                         | 10.83                 | Mottle Black_2016                                    | 12.79                 | IPB Bam-2                                                | 13.60                      | 16.25                      |
| IPB Bam-1                                                         | 10.81                 | GHC36105                                             | 12.38                 | IPB Bam-1                                                | 12.70                      | 14.14                      |
| GHC36105                                                          | 6.87                  | BC31107                                              | 5.13                  | GHC36105                                                 | 9.81                       | 13.27                      |
| BD                                                                | 6.66                  | Nav4-13                                              | 4.76                  | 99SB4-2NAM-A                                             | 7.30                       | 7.86                       |
| 99SB4-2NAM-A                                                      | 6.57                  | TVSU89                                               | 4.47                  | BD                                                       | 7.00                       | 7.06                       |
| BCGC 23107                                                        | 3.69                  | Zebra Cream-10                                       | 4.19                  | 104S-1913NAM                                             | 4.01                       | 5.71                       |
| 109BWA1BWA-1                                                      | 3.66                  | IPB Bam-2                                            | 3.98                  | 109BWA1BWA-1                                             | 4.41                       | 4.94                       |
| IPB Bam-6                                                         | 3.44                  | IPB Bam-6                                            | 3.26                  | LunT_CFF                                                 | 0.89                       | 3.82                       |
| 104S-1913NAM                                                      | 3.29                  | LBLBE                                                | 2.98                  | DodR_CFF                                                 | 1.88                       | 3.55                       |
| Cikur 2.1                                                         | 3.20                  | DBB                                                  | 2.81                  | Cikur 2.1                                                | 2.75                       | 3.06                       |
| 56Acc89MLI-C                                                      | 2.86                  | IPB Bam-1                                            | 2.59                  | 91UNISRSWA-B                                             | 2.33                       | 2.72                       |
| 91UNISRSWA-B                                                      | 2.12                  | DodR_CFF                                             | 2.21                  | 92AHM968NAM-C                                            | 2.04                       | 2.58                       |
| BH 16107                                                          | 2.11                  | 99SB4-2NAM-A                                         | 1.69                  | IPB Bam-6                                                | 2.98                       | 2.22                       |
| 92AHM968NAM-C                                                     | 1.92                  | 92AHM968NAM-C                                        | 1.39                  | BCGC 23107                                               | 3.15                       | 1.38                       |
| 100SB16ANMAMCA16                                                  | 1.64                  | 56Acc89MLI-C                                         | 1.35                  | 100SB16ANMAMCA16                                         | 0.87                       | -0.12                      |
| <b>Selection index 4: Omega 3 &amp; 6 Fatty acid, yield</b>       |                       |                                                      |                       | <b>Selection index 5: Yield</b>                          |                            |                            |
| <i>Scenarios:</i> a) Linoleic, linolenic acid & 1 yield component |                       |                                                      |                       | <i>Scenarios:</i> a) 1 yield component                   |                            |                            |
| b) Linoleic, linolenic acid & 2 yield component                   |                       |                                                      |                       | b) 2 yield component                                     |                            |                            |
|                                                                   |                       |                                                      |                       | c) 3 yield component                                     |                            |                            |

**Traits** a) Linoleic, linolenic acid, seed weight  
**selected:** b) Linoleic, linolenic acid, seed weight, seed number

**Traits** a) Seed weight  
**selected:** b) Seed weight & number  
c) Seed weight, seed number & seed size

| <i>Bambara groundnut</i> | <i>Scenario</i>   | <i>Scenario</i>   | <i>Bambara groundnut</i> | <i>Scenario</i>   | <i>Scenario</i>   | <i>Scenario</i>   |
|--------------------------|-------------------|-------------------|--------------------------|-------------------|-------------------|-------------------|
| <i>line</i>              | <i>score (4a)</i> | <i>score (4b)</i> | <i>line</i>              | <i>score (5a)</i> | <i>score (5b)</i> | <i>score (5c)</i> |
| GHC36105                 | 15.33             | 18.79             | GHC36105                 | 11.70             | 14.23             | 15.41             |
| Mottle Black_CFF_2016    | 12.16             | 10.73             | IPB Bam-2                | 11.68             | 13.83             | 15.48             |
| 109BWA1BWA-1             | 7.87              | 8.40              | IPB Bam-1                | 10.39             | 11.46             | 13.76             |
| IPB Bam-2                | 6.75              | 9.40              | BD                       | 4.88              | 4.94              | 6.31              |
| IITA686_CFF_2016         | 5.94              | 4.69              | 99SB4-2NAM-A             | 4.73              | 6.10              | 5.85              |
| BC31107                  | 4.51              | 2.52              | 109BWA1BWA-1             | 4.56              | 5.69              | 5.83              |
| IPB Bam-1                | 4.48              | 5.92              | DodR_CFF                 | 3.43              | 4.18              | 5.12              |
| Nav4-13                  | 4.09              | 2.50              | 104S-1913NAM             | 3.42              | 4.78              | 4.54              |
| Zebra Cream-10           | 3.81              | 2.85              | IPB Bam-6                | 2.21              | 1.73              | 1.63              |
| TVSU89                   | 3.78              | 2.31              | 92AHM968NAM-C            | 2.10              | 2.80              | 2.30              |
| DodR_CFF                 | 3.06              | 4.72              | 91UNISRSWA-B             | 1.96              | 2.14              | 2.41              |
| IPB Bam-6                | 2.81              | 2.05              | LunT_CFF                 | 1.16              | 2.65              | 2.85              |
| 99SB4-2NAM-A             | 2.43              | 2.98              | 56Acc89MLI-C             | 1.39              | 2.54              | 2.20              |
| LBLBE                    | 2.25              | 0.44              | IITA686_CFF_2016         | 0.93              | 0.46              | -0.54             |
| Dotted Brown black eye   | 2.09              | 0.85              | Cikur 2.1                | 0.59              | 0.07              | 0.23              |
